# Supplementary material for: The fabrication of 3D hierarchical flower-like δ-MnO2@COF nanocomposites for the efficient and ultra-fast removal of UO22+ ions from aqueous solution
Source: Royal Society of Chemistry journal article supplement (doi:10.1039/d0en00793e), 2020-01-01
Supplement: d0en00793e1.pdf [file d0en00793e1.pdf]

## Electronic Supplementary Information

### **Fabrication of 3D hierarchical flower-like $\delta$ -MnO<sub>2</sub>@COF nanocomposites for the efficient and ultra-fast removal of UO<sub>2</sub><sup>2+</sup> ion from aqueous solution**

Xin Zhong<sup>a</sup>, Zhipeng Lu<sup>a</sup>, Wen Liang<sup>a</sup>, Xiaojie Guo<sup>b\*</sup>, Baowei Hu<sup>a\*</sup>

<sup>a</sup> School of Life Science, Shaoxing University, Huancheng West Road 508, Shaoxing 312000, P.R. China

<sup>b</sup> College of Materials and Environmental Engineering, Hangzhou Dianzi University, Xiasha High Education Zone, Hangzhou, 310018, PR China

Corresponding author e-mail:

Baowei Hu: [hbw@usx.edu.cn](mailto:hbw@usx.edu.cn)

Xiaojie Guo: [xiaojie.guo@hdu.edu.cn](mailto:xiaojie.guo@hdu.edu.cn)

#### 1. Chemicals

1, 3, 5-triformylphloroglucinol ( $\geq 95\%$ , Tp) was obtained from Chinese Academy of Science Jilin Yanshen Technology Company. Other chemicals were analytical reagents or better and supplied by Macklin Chemical Reagent Company. All reagents were used directly without further purification.

The crystallographic data of  $\delta$ -MnO<sub>2</sub> acquired from American Mineralogist Crystal Structure Database.

## 2. Figures

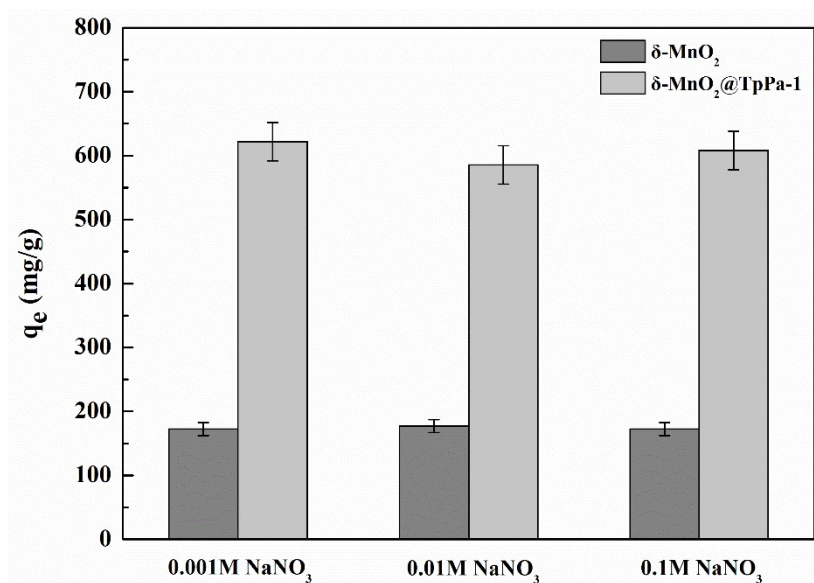

**Fig. S1** The influence of ionic strength on the removal efficiency  $\text{UO}_2^{2+}$  ion adsorption onto  $\delta$ -MnO<sub>2</sub> and  $\delta$ -MnO<sub>2</sub>@TpPa-1.

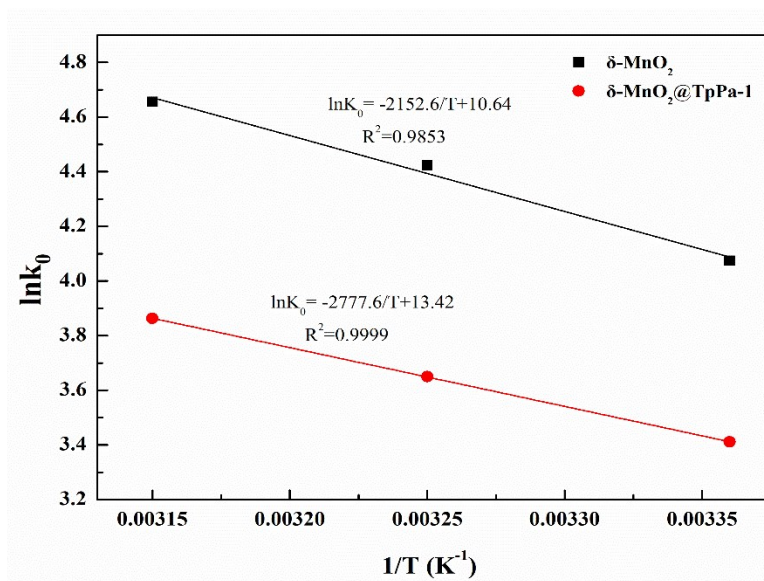

**Fig. S2** The linear plots of  $\ln K_0$  of  $\text{UO}_2^{2+}$  ion versus  $1/T$  at three different temperatures ( $T=298$ - $318$  K).

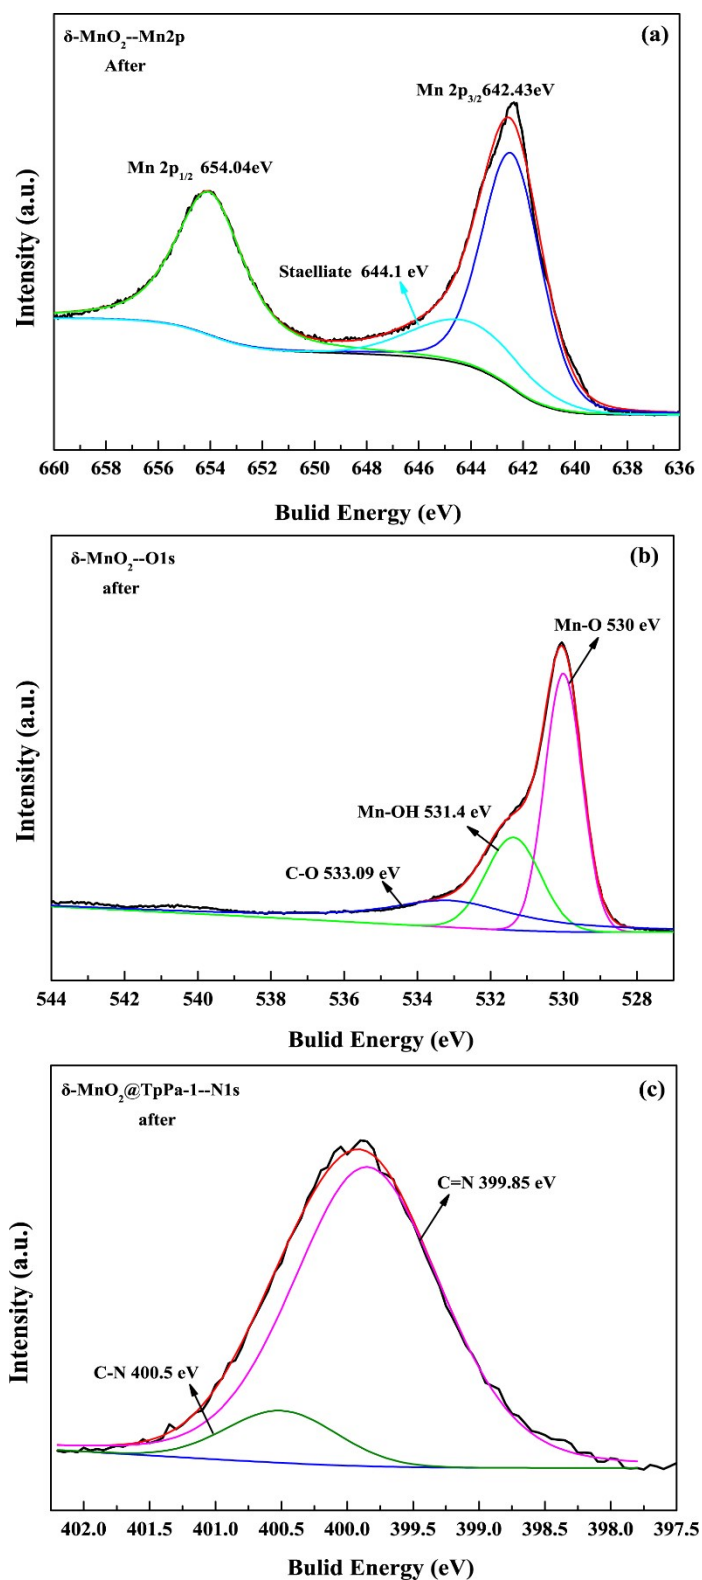

**Fig. S3** XPS spectra of  $\delta\text{-MnO}_2$  and  $\delta\text{-MnO}_2\text{@TpPa-1}$ : (a)  $\delta\text{-MnO}_2\text{-Mn2p}$ ; (b)  $\delta\text{-MnO}_2\text{-O1s}$ ; (c)  $\delta\text{-MnO}_2\text{@TpPa-1}$  N 1s after  $\text{UO}_2^{2+}$  ion adsorption.
